# Supplementary material for: Self-assemblies of γ-CDs with pentablock copolymers PMA-PPO-PEO-PPO-PMA and endcapping via atom transfer radical polymerization of 2-methacryloyloxyethyl phosphorylcholine
Source: publisher site journal article supplement (doi:10.3762/bjoc.11.247), 2015-11-23
Supplement: Additional file 1 [file 1860-5397-11-247-S1.pdf]

## Supporting Information

for

# Self-assemblies of $\gamma$ -CDs with pentablock copolymers PMA-PPO-PEO-PPO-PMA and end-capping via atom transfer radical polymerization of 2-methacryloyloxyethyl phosphorylcholine

Jing Lin, Tao Kong, Lin Ye, Ai-ying Zhang and Zeng-guo Feng\*

Address: School of Materials Science and Engineering, Beijing Institute of Technology, Beijing 100081, China

Email: Zeng-guo Feng - [sainfeng@bit.edu.cn](mailto:sainfeng@bit.edu.cn)

\*Corresponding author

### Additional experimental data

#### Contents

<sup>1</sup>H NMR spectra of BrPEPBr and PEP100M.

GPC curves of BrPEPBr, PEP40M, PEP60M and PEP100M.

TEM image of PMA-PPO-PEO-PPO-PMA in water.

<sup>1</sup>H NMR spectrum of PR0CD30P.

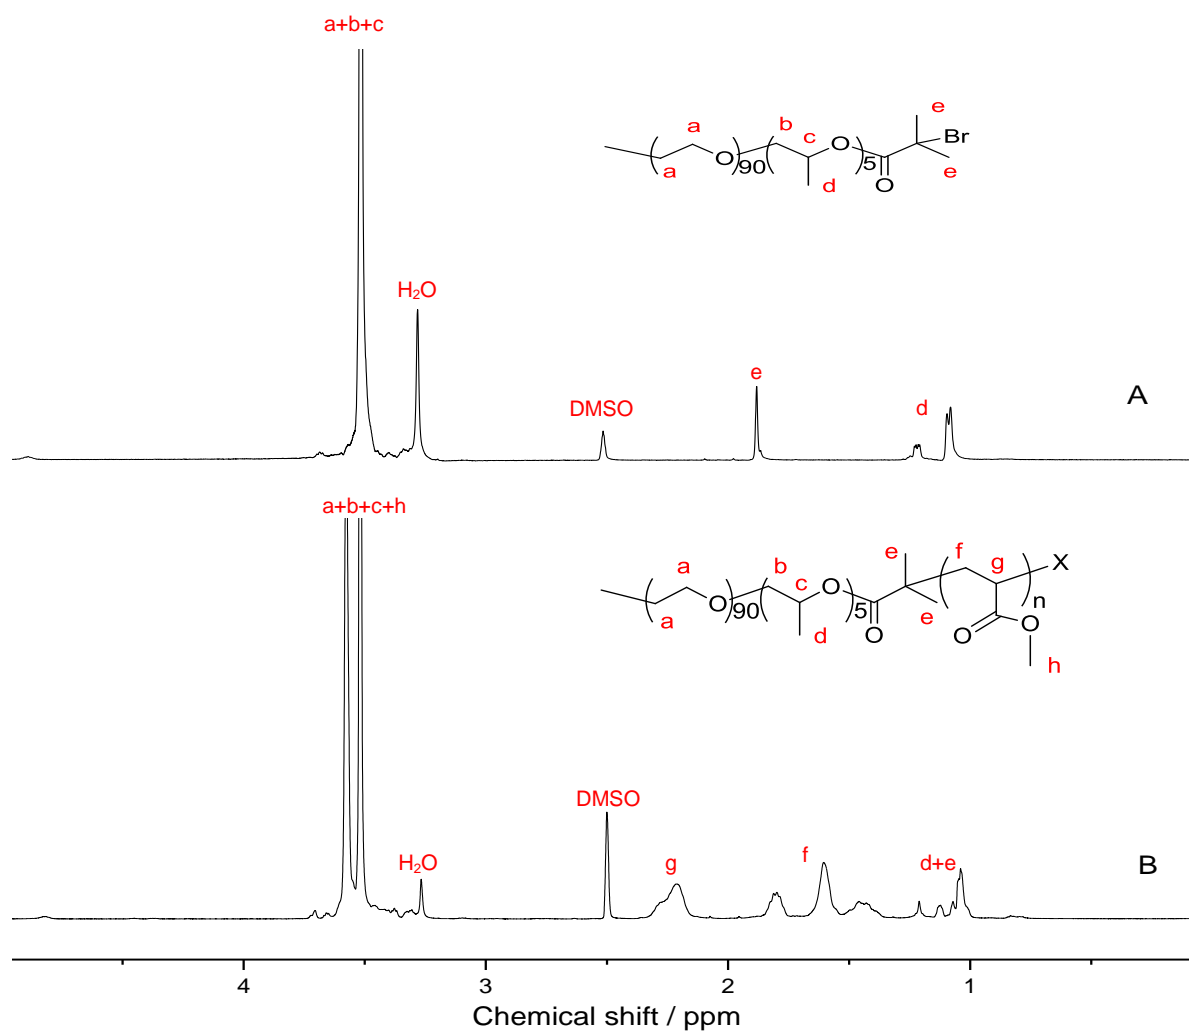

**Figure S1:**  $^1\text{H}$  NMR spectra of BrPEPBr (A) and PEP100M (B).

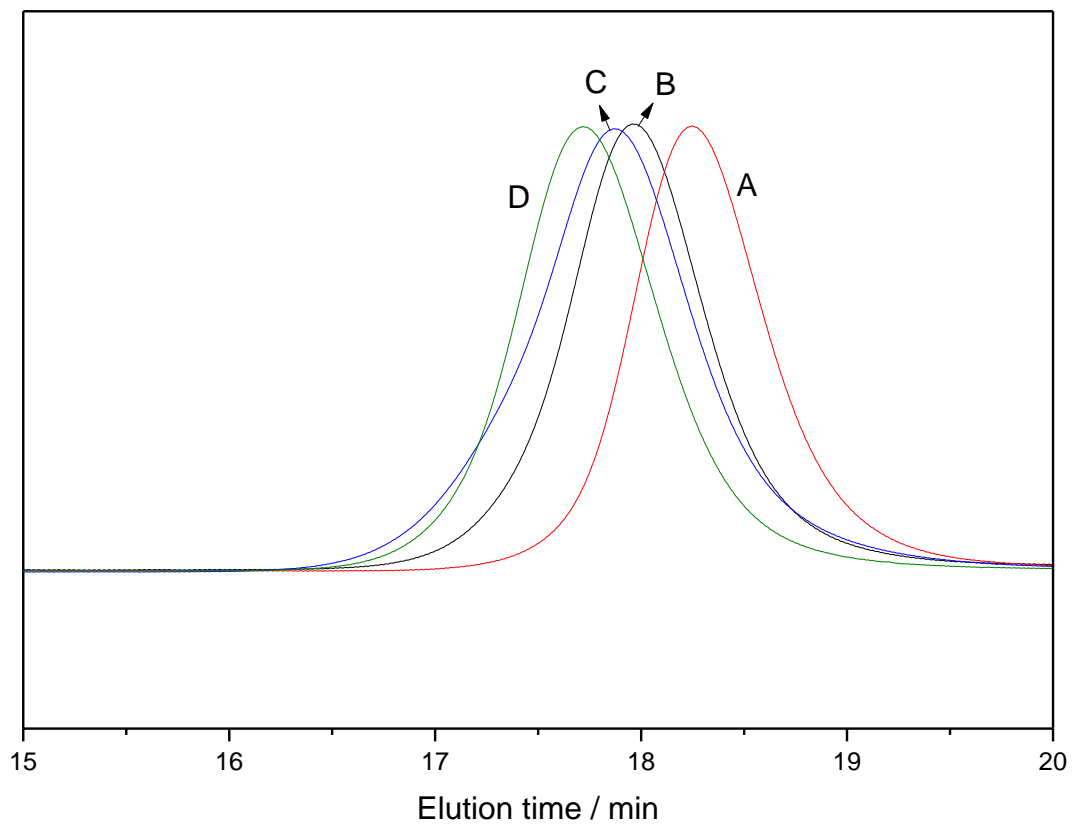

**Figure S2:** GPC curves of BrPEPBr (A), PEP40M (B), PEP60M (C) and PEP100M (D).

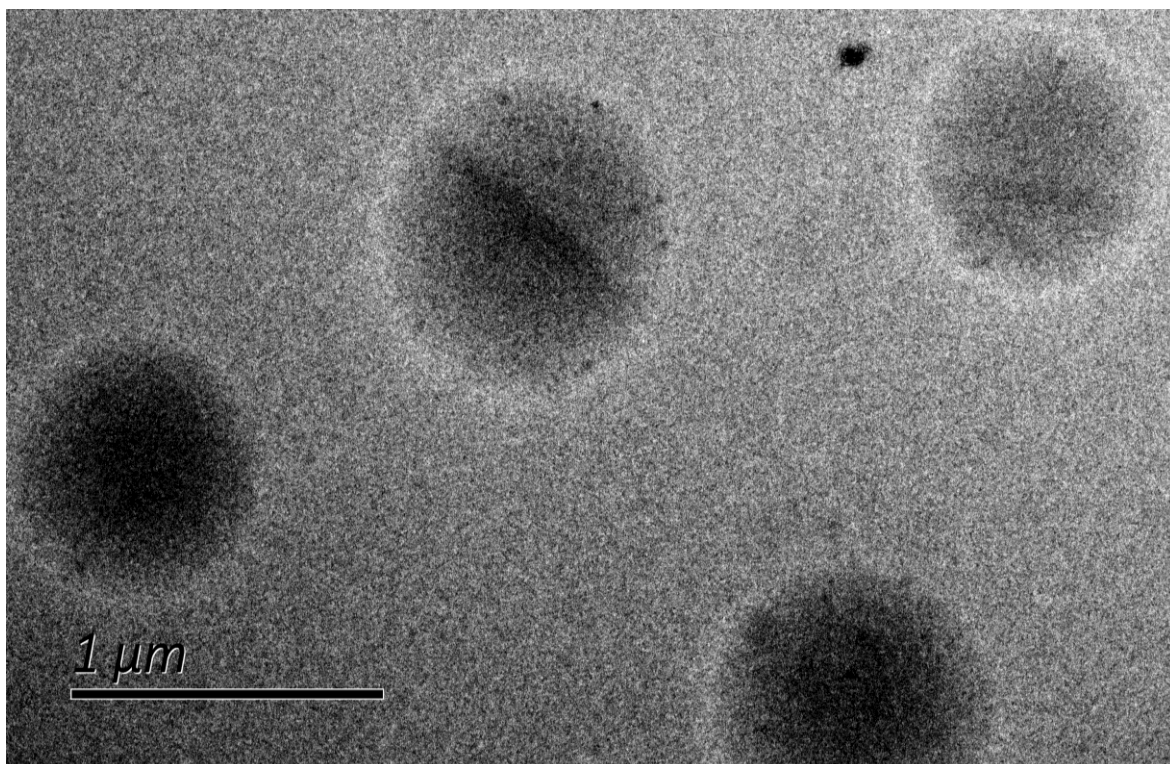

**Figure S3:** TEM image of PMA-PPO-PEO-PPO-PMA in water.

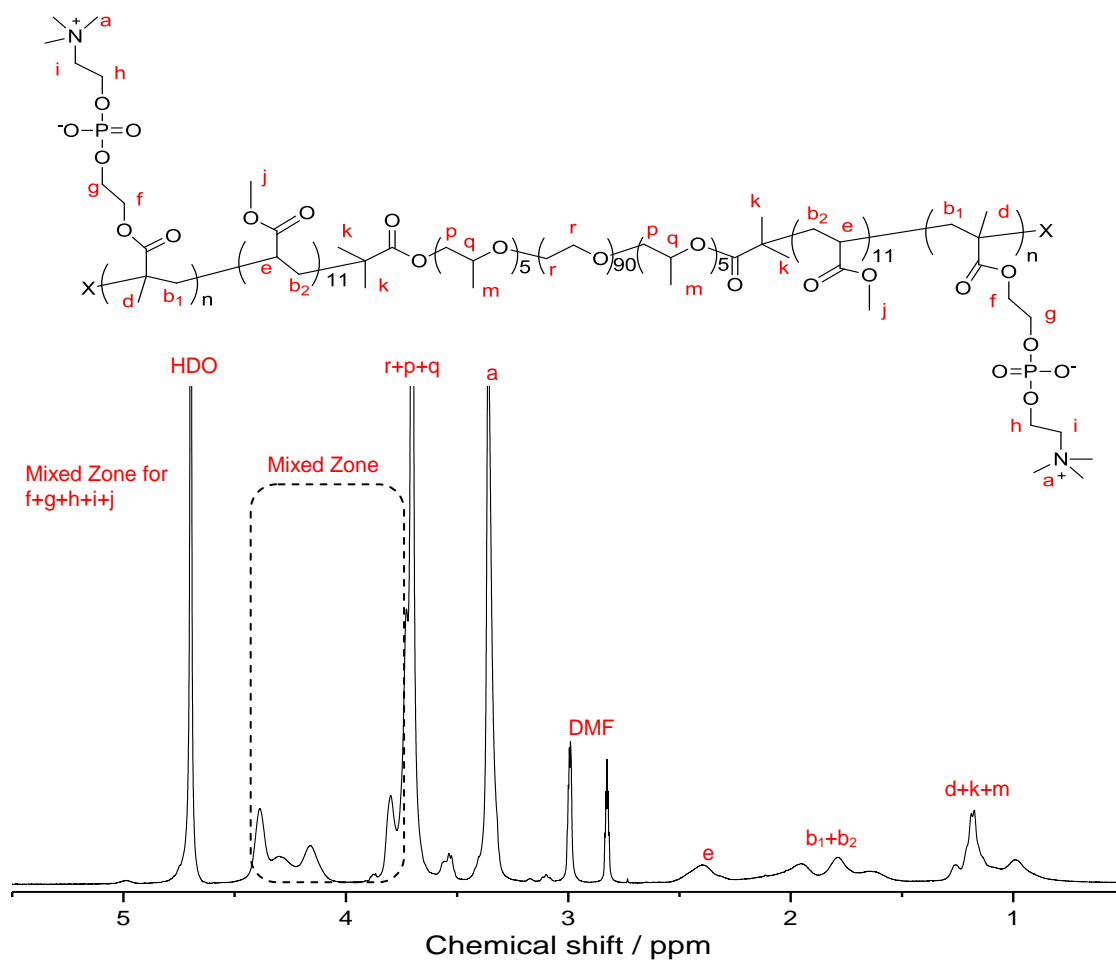

**Figure S4:** <sup>1</sup>H NMR spectrum of PR0CD30P.
